# Supplementary material for: Integrative Epigenetic and Molecular Analysis Reveals a Novel Promoter for a New Isoform of the Transcription Factor TEAD4
Source: MDPI journal article supplement (doi:10.3390/ijms25042223), 2024-02-13
Supplement: s1 [file s1]

Supplementary information

## **Integrative epigenetic and molecular analysis reveals a novel promoter for a new isoform of the transcription factor TEAD4**

Shima Rashidiani <sup>1</sup>, Gizaw Mamo <sup>1</sup>, Benjámín Farkas <sup>1</sup>, András Szabadi<sup>1,2</sup>, Bálint Farkas <sup>3,4</sup>, Veronika Uszkai <sup>3</sup>, András Császár <sup>3</sup>, Barbara Brandt <sup>5</sup>, Kálmán Kovács <sup>3,4</sup>, Marianna Pap <sup>5,#</sup> and Tibor A. Rauch <sup>1,#,\*</sup>

<sup>1</sup> Institute of Biochemistry and Medical Chemistry, Medical School, University of Pécs; 7624 Pécs, Hungary

<sup>2</sup> Department of Dentistry, Oral and Maxillofacial Surgery, Medical School, University of Pécs, 7623 Pécs, Hungary

<sup>3</sup> Department of Obstetrics and Gynecology, Medical School, University of Pécs, 7624 Pécs, Hungary;

<sup>4</sup> National Laboratory of Human Reproduction, University of Pécs, 7624 Pécs, Hungary

<sup>5</sup> Department of Medical Biology and Central Electron Microscope Laboratory, Medical School, University of Pécs; 7624 Pécs, Hungary

\* Correspondence: [tibor.rauch@aok.pte.hu](mailto:tibor.rauch@aok.pte.hu)

# Shared authors

Supplementary information

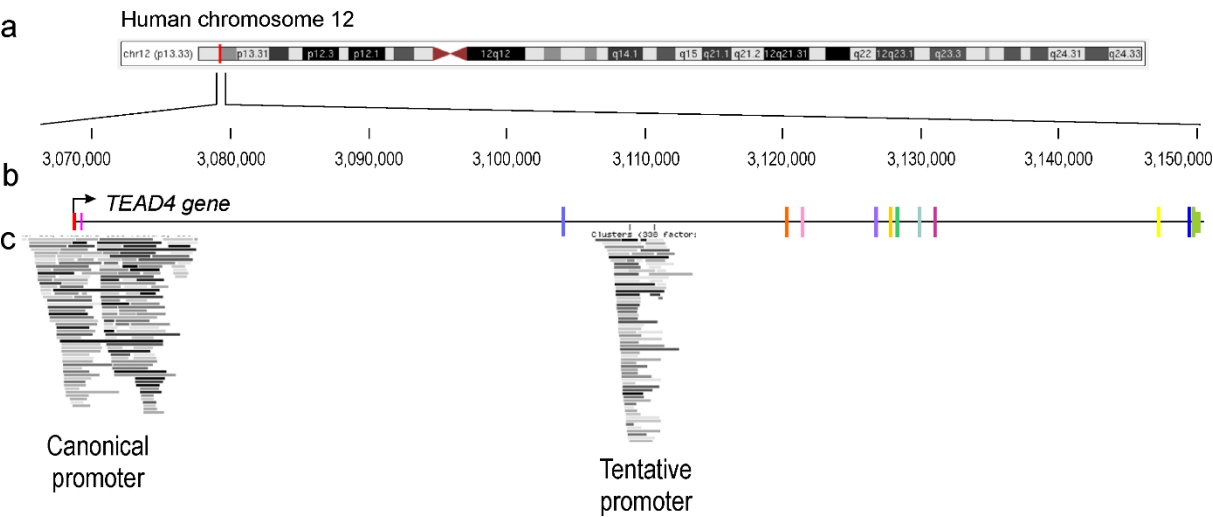

Figure S1. The transcription factor ChIP-Seq data in the TEAD4 locus. (a) The TEAD4 gene is located on the left arm of human chromosome 12, as indicated by the vertical red line. The exon/intron structure of the TEAD4 gene is shown in (b) with colored vertical lines representing exons and thin horizontal lines representing intronic regions. (c) The location of ChIP-Seq data for specific transcription factors is represented by gray horizontal lines.

# Supplementary information

>TEAD4-ΔN

CCAGCCCTCCCCTTGAGCACCTCTTACCCTCCTGGGCCGGCTCCCGAGCCCGGGGTGCTTGCCTTCTCCTGCT  
CACGGCCGCTTTCATTTCTGCCCTGTCACTGTGTGACCCTCCCCCTGGCACAGCCAACGCTGGCCACCCTGAC  
CTCCTTTGGCCAGGCTCACAGTCGGCCTAGCCTAGCGTGCAGTCGGAACGAGCTGATTGCCCGCTACATCAA  
GCTCCGGACAGGGAAGACCCGCACCAGGAAGCAGGTCTCCAGCCACATCCAGGTGCTGGCTCGTCGCAAAGCT  
CGCGAGATCCAGGCCAAGCTAAAGGACCAGGCAGCTAAGGACAAGGCCCTGCAGAGCATGGCTGCCATGTCGT  
CTGCACAGATCATCTCCGCCACGGCCTTCCACAGTAGCATGGCCCTCGCCCGGGGCCCCGGCCGCCAGCAGT  
CTCAGGGTTTGGCAAGGAGCTTTGCCAGGCCAAGCCGGAACGTCCCATGATGTGAAGCCTTTCTCTCAGCAA  
ACCTATGCTGTCCAGCCTCCGCTGCCTCTGCCAGGGTTTGAGTCTCCTGCAGGGCCCCGCCCATCGCCCTCTG  
CGCCCCCGGCACCCCCATGGCAGGGCCGCAGCGTGGCCAGCTCCAAGCTCTGGATGTTGGAGTTCTCTGCCTT  
CCTGGAGCAGCAGCAGGACCCGGACACGTACAACAAGCACCTGTTTCGTGCACATTGGCCAGTCCAGCCCAAGC  
TACAGCGACCCCTACCTCGAAGCCGTGGACATCCGCCAAATCTATGACAAATTCCCGGAGAAAAAGGGTGGAC  
TCAAGGATCTCTTCGAACGGGGACCCTCCAATGCCTTTTTTCTTGTGAAGTTCTGGGCAGACCTCAACACCAA  
CATCGAGGATGAAGGCAGCTCCTTCTATGGGGTCTCCAGCCAGTATGAGAGCCCCGAGAACATGATCATCACC  
TGCTCCACGAAGGTCTGCTCTTTTCGGCAAGCAGGTGGTGGAGAAAGTTGAGACAGAGTATGCTCGCTATGAGA  
ATGGACACTACTCTTACCGCATCCACCGGTCCCCGCTCTGTGAGTACATGATCAACTTCATCCACAAGCTCAA  
GCACCTCCCTGAGAAGTACATGATGAACAGCGTGTGGAGAACTTCACCATCCTGCAGGTGGTCACCAACAGA  
GACACACAGGAGACCTTGCTGTGCATTGCCTATGTCTTTGAGGTGTCAGCCAGTGAGCACGGGGCTCAGCACC  
ACATCTACAGGCTGGTGAAAGAATGAGAGACTCGGGGAGCAGGGAGGGGGGAAG

Figure S2. The primary nucleotide sequence of the mRNA encoding the truncated TEAD4 isoform. The sequence contains alternating exons, indicated by yellow and gray shading. The novel (non-coding) exon sequence is underlined in red, while the open reading frame (ORF) is marked in bold.

## Supplementary information

The Sequence Manipulation Suite: Multiple Align Show

```

TEAD4_FL      GTCCTCCCTCGCACACTCGAGGCCAGGGGGCGGGAGGGCGGCGCTCCGGTCCGCGCGCGCTCCGCGACAAAGATCGCCGGGCGCCGCAACA 90
TEAD4-N      CCAGGCCCTCC-----CCTTGAG-----CACCTCTTACC-----CTCCTGCGCGGCTCCCGAGCCCGGGTG 87

TEAD4_FL      GTTGGCGGTCGGGGCGGACTCCTTGGAACTGGCTTAGCGGCAACCATCCACCTTCCCGCACCTGGGACCGGTCCAAAGAGCGCTCCTCG 180
TEAD4-N      G-----TGG-----CCTT-----TTCCTG----- 71

TEAD4_FL      AAGCGGAGCCTTGGAGGGCAGGCGCGGCACCATTAACCTCCAAACAGTGGAGCTCTCCACCTCCCTGAGGGGAGCACCGCCTCTGGGG 270
TEAD4-N      -----CTCAGGCGCGCTT-----T----- 85

TEAD4_FL      CAGTCAGGCACTGGACAAAGCCCATCGACCAATGACCGACAGGGCGTGTGAGCCCGGATATTGAGCAGAGTTTCAGGAGGCCCTCGC-CA 359
TEAD4-N      -----CATTTCTGCGCTGCACTGTGTGACCTTCCCGCTG-GCACAGC---CAA---CGCTGGCCAG 140

TEAD4_FL      TCTACCCGCCCTGTGGCAGGCGCAAAATCATCCTCTCGGACGAGGGCAAGATGTATGGTCGGAACGAGCTGATTGCCCGCTACATCAAGC 449
TEAD4-N      CCTGACCTCCTTTGGCCAGGCTCACAGTGGCTAG-----CCTAG-CGTGCAAGTCGGAACGAGCTGATTGCCCGCTACATCAAGC 221

TEAD4_FL      TCCGGACAGGGAAGACCCGACACAGGAAGCAGGTCTCCAGCCACATCCAGGTGCTGGCTCGTGGCAAAGCTCGCGAGATCCAGGCCAAGC 539
TEAD4-N      TCCGGACAGGGAAGACCCGACACAGGAAGCAGGTCTCCAGCCACATCCAGGTGCTGGCTCGTGGCAAAGCTCGCGAGATCCAGGCCAAGC 311

TEAD4_FL      TAAAGGACAGGCGAGCTAAGGACAAAGGCCCTGCAGAGCATGGCTGCCATGTGCTCTGCACAGATCATCTCCGCCACGGCCTTCCACAGTA 629
TEAD4-N      TAAAGGACAGGCGAGCTAAGGACAAAGGCCCTGCAGAGCATGGCTGCCATGTGCTCTGCACAGATCATCTCCGCCACGGCCTTCCACAGTA 401

TEAD4_FL      GCATGGCCCTCGCCCGGGGGCCCGCGCCGCCAGCAGTCTCAGGGTTTTGGCAAGGAGCTTTGCCAGGCCAAGCCGGAACGTCCCATGATG 719
TEAD4-N      CATGGCCCTCGCCCGGGGGCCCGCGCCGCCAGCAGTCTCAGGGTTTTGGCAAGGAGCTTTGCCAGGCCAAGCCGGAACGTCCCATGATG 491

TEAD4_FL      TGAAGCCTTTTCTCTCAGCAAAACCTATGCTGTCCAGCCTCCCGCTGCCCTTGCAGGGTTTGAAGTCTCCTGCAAGGGCCCGCCCATCGCCCT 809
TEAD4-N      TGAAGCCTTTTCTCTCAGCAAAACCTATGCTGTCCAGCCTCCCGCTGCCCTTGCAGGGTTTGAAGTCTCCTGCAAGGGCCCGCCCATCGCCCT 581

TEAD4_FL      CTGCGCCCCCGGCACCCCCATGGCAGGGCCGCGAGCTGGCCAGCTCCAAAGCTCTGGATGTTGGAGTTCTCTGCCCTTCTGGAGCAGCAGC 899
TEAD4-N      CTGCGCCCCCGGCACCCCCATGGCAGGGCCGCGAGCTGGCCAGCTCCAAAGCTCTGGATGTTGGAGTTCTCTGCCCTTCTGGAGCAGCAGC 671

TEAD4_FL      AGGACCCGGACAGCTACAACAAGCACTGTTGCTGCACATTGGCCAGTCCAGCCCAAGCTACAGCGACCCCTACCTCGAAGCCGTGGACA 989
TEAD4-N      AGGACCCGGACAGCTACAACAAGCACTGTTGCTGCACATTGGCCAGTCCAGCCCAAGCTACAGCGACCCCTACCTCGAAGCCGTGGACA 761

TEAD4_FL      TCCGCCAAATCTATGACAAATTCCCGGAGAAAAAGGGTGGACTCAAGGATCTCTTCGAACGGGGACCCCTCCAATGCCCTTTTTTCTGTGTA 1079
TEAD4-N      TCCGCCAAATCTATGACAAATTCCCGGAGAAAAAGGGTGGACTCAAGGATCTCTTCGAACGGGGACCCCTCCAATGCCCTTTTTTCTGTGTA 851

TEAD4_FL      AGTTCTGGGCGAGACCTCAACACCAACATCGAGGATGAAGGCAGTCCCTTCTATGGGGTCTCCAGCCAGTATGAGAGCCCGAGAACATGA 1169
TEAD4-N      AGTTCTGGGCGAGACCTCAACACCAACATCGAGGATGAAGGCAGTCCCTTCTATGGGGTCTCCAGCCAGTATGAGAGCCCGAGAACATGA 941

TEAD4_FL      TCATCACCTGCTCCACGAAGGTCTGCTCTTTCCGCAAGCAGGTGGTGGAGAAAGTTGAGACAGAGTATGCTCGCTATGAGAATGGACACT 1259
TEAD4-N      TCATCACCTGCTCCACGAAGGTCTGCTCTTTCCGCAAGCAGGTGGTGGAGAAAGTTGAGACAGAGTATGCTCGCTATGAGAATGGACACT 1031

TEAD4_FL      ACTCTTACCGCATCCACCGGTCCCGCTCTGTGAGTACATGATCAACTTCATCCACAAGCTCAAGCACTCCCTGAGAAGTACATGATGA 1349
TEAD4-N      ACTCTTACCGCATCCACCGGTCCCGCTCTGTGAGTACATGATCAACTTCATCCACAAGCTCAAGCACTCCCTGAGAAGTACATGATGA 1121

TEAD4_FL      ACAGCGTGTGGAGAACTTCACCATCCTGCAGGTGGTCAACCAACAGAGACACACAGGAGACCTTGTGTGCAATTGCCCTATGTCTTTGAGG 1439
TEAD4-N      ACAGCGTGTGGAGAACTTCACCATCCTGCAGGTGGTCAACCAACAGAGACACACAGGAGACCTTGTGTGCAATTGCCCTATGTCTTTGAGG 1211

TEAD4_FL      TGTAGCCAGTGAGCACGGGGCTCAGCACCAACATCTACAGGCTGGTGAAGAAATGAGAGACTCGGGGAGCAGGGAGGGGGGAAGAGACGT 1529
TEAD4-N      TGTAGCCAGTGAGCACGGGGCTCAGCACCAACATCTACAGGCTGGTGAAG----- 1260

TEAD4_FL      GTGTGCAGGAAACGGGGACGTGGGGAGGGGACCTGCAGGGGCAGCCCTCTGAAGTGCCAAAGAGAGCTGAGAGGAGCAGTTGTGACTTAC 1619
TEAD4-N      -----A----- 1261

TEAD4_FL      CAGGAACAACTGTGCTTGAACC TGAAGGTGCCCAACCCCAATTAACCCAACTGCTGTGATTTTCAGA 1690
TEAD4-N      GAA-----TGA-----SAGACTGGCGAGCGAGGAGGGGGGAG 1295

```

Figure S3.  
Pairwise

alignment of mRNAs encoding TEAD4 isoforms. The nucleotide sequences of the full-length coding transcript of TEAD4 and the newly identified TEAD4-ΔN isoform encoding transcript are aligned using . The nucleotides highlighted in red are identical residues.

Supplementary information

| Analysis                    | Name                 | Forward/Reverse                             | Notes                                            |
|-----------------------------|----------------------|---------------------------------------------|--------------------------------------------------|
| 5'RACE                      | Anchor_F1            | GACCACGCGTATCGATGTCGACTTTTT<br>TTTTTTTTTTTV |                                                  |
|                             | Anchor_F2            | GTATCGATGTCGACTTTTTTTTTT                    |                                                  |
|                             | GenSpec_RT           | ACTCAAACCCTGGCAG                            | Reverse<br>transcription                         |
|                             | GenSpec_R1           | CATGGGACGTTCCGGC                            |                                                  |
|                             | GenSpec_R2           | AAGCTCCTTGCCAAAAC                           |                                                  |
| Gene expr.                  | TEAD4-C_F            | TGAGCAGAGTTTCCAGGAGG                        | End-point PCR                                    |
|                             | TEAD4-C_R            | CCTTGCCAAAACCCTGAGAC                        |                                                  |
|                             | TEAD4-del_F          | TCCCCTTGAGCACCTCTTAC                        | End-point PCR                                    |
|                             | TEAD4-del_R          | TCTCAGGGTTTTGGCAAGGA                        |                                                  |
| Promoter<br>cloning         | TEAD-<br>PromC_oF    | TCATGCACTTCCTATCCCA                         | Nested PCR                                       |
|                             | TEAD-<br>PromC_oR    | TGAGGGCTGGAATGAGATGC                        |                                                  |
|                             | TEAD-<br>PromC_InF   | aactcgagCCACCCAACACAAGGCTAAG                |                                                  |
|                             | TEAD-<br>PromC_InR   | aaaagcttGGCTGGAATGAGATGCGC                  |                                                  |
|                             | TEAD-<br>PromAlt_oF  | TCTCTTTGGCAGGAGGGAAG                        | Nested PCR                                       |
|                             | TEAD-<br>PromAlt_oR  | CAGGAGGGTAAGAGGTGCTC                        |                                                  |
|                             | TEAD-<br>PromAlt_inF | aactcgagCAGTCTGCTTCCCTGAGTCA                |                                                  |
|                             | TEAD-<br>PromAlt_inR | aaaagcttGTTAATCTGCCGTGCTGCTT                |                                                  |
|                             | Prom-Seq_F           | gtacgggagggtacttgagcg                       | Sanger Seq                                       |
|                             | Prom-Seq_R           | ccacctgatatgtcatctgtaaaa                    |                                                  |
| Fusing cDNAs<br>to FP       | TEAD4-EGFP_F         | aaaaagcttGCCATGGAGGGCACGGC                  | TTG mutated to<br>ATG to increase<br>translation |
|                             | TEAD4-EGFP_R         | aaggatccTTCTTTCACCAGCCTGTA                  |                                                  |
|                             | TEAD4-RFP_F          | aaaagcttATGGCTGCCATGTCGTCTG                 |                                                  |
|                             | TEAD4-RFP_R          | aaggatccTTCTTTCACCAGCCTGTA                  |                                                  |
|                             | EGFP-Seq_F           | CCTCGCCCTCGCCGGA                            | Sanger Seq                                       |
|                             | RFP-Seq_F            | GCCCTCGTAGGGCTTGC                           |                                                  |
| DNA<br>methylation<br>anal. | BS_PromC_F           | ATGGTATGTTATATGGATTTTAAAT                   |                                                  |
|                             | BS_PromC_R           | CAAAAAAACTACTCCCTTCCTAC                     |                                                  |
|                             | BS_PromAlt_F         | TAGGTTTTGTGGGATTTAGATATT                    |                                                  |
|                             | BS_PromAlt_R         | CATCCACACACTAAAAATAAACTC                    |                                                  |
|                             | T7                   | GCCAAGCTCTAATACGACTCACTATA<br>GG            | Sanger Seq                                       |
|                             | Sp6                  | GCCATTTAGGTGACACTATAGAATAC                  |                                                  |

Table S1. Oligonucleotides used in end-point PCR, cloning and DNA methylation (i.e., Bisulfite Sequencing) analysis

Supplementary information

| Analysis                   | Name               | Forward/Reverse                  | Notes     |
|----------------------------|--------------------|----------------------------------|-----------|
| <b>E<br/>M<br/>S<br/>A</b> | TEAD4-ΔN-Bio_F     | CCCTCTGGGAGGCGGAATGGGAGGCCGAGCTG | 5'-biotyn |
|                            | TEAD4-ΔN_F         | CCCTCTGGGAGGCGGAATGGGAGGCCGAGCTG |           |
|                            | TEAD4-ΔN_R         | CAGCTCGGCCTCCCATTCGCTCCAGAGGG    |           |
|                            | TEAD4-ΔN-Mut_Bio_F | CCCTCTGGGAGGCGGACGGGGAGGCCGAGCTG | 5'-biotyn |
|                            | TEAD4-ΔN-Mut_F     | CCCTCTGGGAGGCGGACGGGGAGGCCGAGCTG |           |
|                            | TEAD4-ΔN-Mut_R     | CAGCTCGGCCTCCCCGTCCGCTCCAGAGGG   |           |
|                            | TEAD4-cons-F-Bio   | CGGCGATGTGACCTGGAATGTGGCGTCCGTAT | 5'-biotyn |
|                            | TEAD4-cons-F       | CGGCGATGTGACCTGGAATGTGGCGTCCGTAT |           |
|                            | TEAD4-cons-R       | ATACGGACGCCACATTCCAGGTCACATCGCCG |           |

Table S2. Oligonucleotides for DNA-protein interaction studies (EMSAs). The corresponding complementary reverse oligos were annealed to the 5'-biotinylated oligos. In competition assays, un-biotinylated forward were annealed and used in essays with varying molar concentrations.
